# Supplementary material
Source: ML conference proceedings conference paper supplement (https://proceedings.mlr.press/v70/osogami17a.html)
Supplement: Supplementary file [file osogami17a-supp.pdf]

## A. Supplementary Materials for *Bidirectional Learning for Time-series Models with Hidden Units*

Here, we derive specific learning rules suggested by (27)-(28) as well as those with approximation with (29). These learning rule can be derived in a way similar to the learning rules (18)-(22) are derived from (17). We also provide some of the details, which are omitted in the derivation of (18)-(22).

The learning rules for  $\mathbf{U}$  and  $\mathbf{Z}$  are derived from (27)-(28) as follows:

$$\mathbf{U}^{[d]} \leftarrow \mathbf{U}^{[d]} + \eta \log p_{\theta}(\mathbf{x}^{[t]} | \mathbf{x}^{[<t]}, \mathbf{h}^{[<t]}) \sum_{s=\ell}^{t-1} \alpha^{[s-1]} (\mathbf{h}^{[s]} - \langle \mathbf{H}^{[s]} \rangle_{\phi})^{\top} \quad (32)$$

$$\mathbf{Z}^{[d]} \leftarrow \mathbf{Z}^{[d]} + \eta \log p_{\theta}(\mathbf{x}^{[t]} | \mathbf{x}^{[<t]}, \mathbf{h}^{[<t]}) \sum_{s=\ell}^{t-1} \beta^{[s-1]} (\mathbf{h}^{[s]} - \langle \mathbf{H}^{[s]} \rangle_{\phi})^{\top} \quad (33)$$

$$\mathbf{U}^{[\delta]} \leftarrow \mathbf{U}^{[\delta]} + \eta \log p_{\theta}(\mathbf{x}^{[t]} | \mathbf{x}^{[<t]}, \mathbf{h}^{[<t]}) \sum_{s=\ell}^{t-1} \mathbf{x}^{[s-\delta]} (\mathbf{h}^{[s]} - \langle \mathbf{H}^{[s]} \rangle_{\phi})^{\top} \quad (34)$$

$$\mathbf{Z}^{[\delta]} \leftarrow \mathbf{Z}^{[\delta]} + \eta \log p_{\theta}(\mathbf{x}^{[t]} | \mathbf{x}^{[<t]}, \mathbf{h}^{[<t]}) \sum_{s=\ell}^{t-1} \mathbf{h}^{[s-\delta]} (\mathbf{h}^{[s]} - \langle \mathbf{H}^{[s]} \rangle_{\phi})^{\top} \quad (35)$$

for  $1 \leq \delta < d$ , where  $\langle \mathbf{H}^{[s]} \rangle_{\phi}$  denotes the expected values of  $\mathbf{h}^{[s]}$  with respect to the conditional distribution given by the following  $p_{\phi}$ :

$$p_{\phi}(\mathbf{h}^{[s]} | \mathbf{x}^{[<s]}, \mathbf{h}^{[<s]}) = \frac{1}{Z'} \exp(-E_{\phi}(\mathbf{h}^{[s]} | \mathbf{x}^{[<s]}, \mathbf{h}^{[<s]})) \quad (36)$$

for any binary vectors  $\mathbf{h}^{[s]}$ , where  $Z'$  is a normalization factor for the probabilities to sum up to one, and

$$E_{\phi}(\mathbf{h}^{[s]} | \mathbf{x}^{[<s]}, \mathbf{h}^{[<s]}) = - \sum_{\delta=1}^{d-1} (\mathbf{x}^{[s-\delta]})^{\top} \mathbf{U}^{[\delta]} \mathbf{h}^{[s]} - \sum_{\delta=1}^{d-1} (\mathbf{h}^{[s-\delta]})^{\top} \mathbf{Z}^{[\delta]} \mathbf{h}^{[s]} - (\alpha^{[s-1]})^{\top} \mathbf{U}^{[d]} \mathbf{h}^{[s]} - (\beta^{[s-1]})^{\top} \mathbf{Z}^{[d]} \mathbf{h}^{[s]}. \quad (37)$$

The energy in (37) can be decomposed into the energy associated with each hidden unit  $j$  as follows:

$$E_{\phi}(\mathbf{h}^{[s]} | \mathbf{x}^{[<s]}, \mathbf{h}^{[<s]}) = \sum_{j \in \mathcal{H}} E_{\phi,j}(h_j^{[s]} | \mathbf{x}^{[<s]}, \mathbf{h}^{[<s]}) \quad (38)$$

where  $\mathcal{H}$  denotes the set of hidden units, and

$$E_{\phi,j}(h_j^{[s]} | \mathbf{x}^{[<s]}, \mathbf{h}^{[<s]}) = - \sum_{\delta=1}^{d-1} (\mathbf{x}^{[s-\delta]})^{\top} \mathbf{U}_{:,j}^{[\delta]} h_j^{[s]} - \sum_{\delta=1}^{d-1} (\mathbf{h}^{[s-\delta]})^{\top} \mathbf{Z}_{:,j}^{[\delta]} h_j^{[s]} - (\alpha^{[s-1]})^{\top} \mathbf{U}_{:,j}^{[d]} h_j^{[s]} - (\beta^{[s-1]})^{\top} \mathbf{Z}_{:,j}^{[d]} h_j^{[s]}, \quad (39)$$

where  $\mathbf{U}_{:,j}$  denotes a column vector corresponding to the  $j$ -th column of  $\mathbf{U}$ , and  $\mathbf{Z}_{:,j}$  is defined analogously.

Then (36) can be expressed as

$$p_{\phi}(\mathbf{h}^{[s]} | \mathbf{x}^{[<s]}, \mathbf{h}^{[<s]}) = \prod_{j \in \mathcal{H}} p_{\phi,j}(h_j^{[s]} | \mathbf{x}^{[<s]}, \mathbf{h}^{[<s]}), \quad (40)$$

where

$$p_{\phi,j}(h_j^{[s]} | \mathbf{x}^{[<s]}, \mathbf{h}^{[<s]}) = \frac{\exp(-E_{\phi,j}(h_j^{[s]} | \mathbf{x}^{[<s]}, \mathbf{h}^{[<s]}))}{\exp(-E_{\phi,j}(h_j^{[s]} = 0 | \mathbf{x}^{[<s]}, \mathbf{h}^{[<s]})) + \exp(-E_{\phi,j}(h_j^{[s]} = 1 | \mathbf{x}^{[<s]}, \mathbf{h}^{[<s]}))} \quad (41)$$

$$= \frac{\exp(-E_{\phi,j}(h_j^{[s]} | \mathbf{x}^{[<s]}, \mathbf{h}^{[<s]}))}{1 + \exp(-E_{\phi,j}(h_j^{[s]} = 1 | \mathbf{x}^{[<s]}, \mathbf{h}^{[<s]}))}. \quad (42)$$

The  $j$ -th element of  $\langle \mathbf{H}^{[s]} \rangle_\phi$  is then given by

$$\langle H_j^{[s]} \rangle_\phi = p_{\phi,j}(h_j^{[s]} = 1 | \mathbf{x}^{[<s]}, \mathbf{h}^{[<s]}) \quad (43)$$

In (32)-(35), the value of  $\langle \mathbf{H}^{[s]} \rangle_\phi$  is computed with the latest values of  $\phi$ . Let  $\phi^{[t-1]}$  be the value of  $\phi$  immediately before step  $t$ . With the recursive computation of (29), the learning rules of (32)-(35) are approximated with the following learning rules:

$$\mathbf{U}^{[d]} \leftarrow \mathbf{U}^{[d]} + \eta(1 - \gamma) \log p_\theta(\mathbf{x}^{[t]} | \mathbf{x}^{[<t]}, \mathbf{h}^{[<t]}) \sum_{s=\ell}^{t-1} \gamma^{t-1-s} \boldsymbol{\alpha}^{[s-1]} (\mathbf{h}^{[s]} - \langle \mathbf{H}^{[s]} \rangle_{\phi^{[s-1]}})^\top \quad (44)$$

$$\mathbf{Z}^{[d]} \leftarrow \mathbf{Z}^{[d]} + \eta(1 - \gamma) \log p_\theta(\mathbf{x}^{[t]} | \mathbf{x}^{[<t]}, \mathbf{h}^{[<t]}) \sum_{s=\ell}^{t-1} \gamma^{t-1-s} \boldsymbol{\beta}^{[s-1]} (\mathbf{h}^{[s]} - \langle \mathbf{H}^{[s]} \rangle_{\phi^{[s-1]}})^\top \quad (45)$$

$$\mathbf{U}^{[\delta]} \leftarrow \mathbf{U}^{[\delta]} + \eta(1 - \gamma) \log p_\theta(\mathbf{x}^{[t]} | \mathbf{x}^{[<t]}, \mathbf{h}^{[<t]}) \sum_{s=\ell}^{t-1} \gamma^{t-1-s} \mathbf{x}^{[s-\delta]} (\mathbf{h}^{[s]} - \langle \mathbf{H}^{[s]} \rangle_{\phi^{[s-1]}})^\top \quad (46)$$

$$\mathbf{Z}^{[\delta]} \leftarrow \mathbf{Z}^{[\delta]} + \eta(1 - \gamma) \log p_\theta(\mathbf{x}^{[t]} | \mathbf{x}^{[<t]}, \mathbf{h}^{[<t]}) \sum_{s=\ell}^{t-1} \gamma^{t-1-s} \mathbf{h}^{[s-\delta]} (\mathbf{h}^{[s]} - \langle \mathbf{H}^{[s]} \rangle_{\phi^{[s-1]}})^\top \quad (47)$$

for  $1 \leq \delta < d$ , where the quantity such as

$$G'_{t-1} \equiv \sum_{s=\ell}^{t-1} \gamma^{t-1-s} \boldsymbol{\alpha}^{[s-1]} (\mathbf{h}^{[s]} - \langle \mathbf{H}^{[s]} \rangle_{\phi^{[s-1]}})^\top \quad (48)$$

can be computed recursively as

$$G'_t \leftarrow \gamma G'_{t-1} + (1 - \gamma) \boldsymbol{\alpha}^{[t-1]} (\mathbf{h}^{[t]} - \langle \mathbf{H}^{[t]} \rangle_{\phi^{[t-1]}})^\top. \quad (49)$$

One may consider real-valued units as well (Dasgupta & Osogami, 2017; Osogami, 2016). For example, each of  $x_i^{[t]}$  and  $h_j^{[t]}$  may have a Gaussian distribution with the following density:

$$p_{\theta,i}(x_i^{[t]} | \mathbf{x}^{[<t]}, \mathbf{h}^{[<t]}) = \frac{1}{\sqrt{2\pi\sigma_i^2}} \exp\left(-\frac{(x_i^{[t]} - E_{\theta,i}(x_i^{[t]} = 1 | \mathbf{x}^{[<t]}, \mathbf{h}^{[<t]}))^2}{2\sigma_i^2}\right) \quad (50)$$

$$p_{\phi,j}(h_j^{[t]} | \mathbf{x}^{[<t]}, \mathbf{h}^{[<t]}) = \frac{1}{\sqrt{2\pi\sigma_j^2}} \exp\left(-\frac{(h_j^{[t]} - E_{\phi,j}(h_j^{[t]} = 1 | \mathbf{x}^{[<t]}, \mathbf{h}^{[<t]}))^2}{2\sigma_j^2}\right), \quad (51)$$

where  $\sigma_i^2$  and  $\sigma_j^2$  are variance parameters,  $E_{\phi,j}$  is given by (39), and  $E_{\theta,i}(x_i^{[t]} = 1 | \mathbf{x}^{[<t]}, \mathbf{h}^{[<t]})$  is given by

$$E_{\theta,i}(x_i^{[s]} = 1 | \mathbf{x}^{[<s]}, \mathbf{h}^{[<s]}) = -b_i - \sum_{\delta=1}^{d-1} (\mathbf{x}^{[s-\delta]})^\top \mathbf{W}_{:,i}^{[\delta]} - \sum_{\delta=1}^{d-1} (\mathbf{h}^{[s-\delta]})^\top \mathbf{V}_{:,i}^{[\delta]} - (\boldsymbol{\alpha}^{[s-1]})^\top \mathbf{W}_{:,i}^{[d]} - (\boldsymbol{\beta}^{[s-1]})^\top \mathbf{V}_{:,i}^{[d]}. \quad (52)$$
